# Supplementary material
Source: PubMed Central journal article supplement (PMC3607377)

## Supplemental Materials

Supplemental Figure 1. Kinetics of fluorescence increases of VCOP mutants in the retinal Schiff base environment. Pigments (VCOP, A and B, VCOP<sup>D108E</sup>, C and D, and VCOP<sup>S85C</sup>, E and F) were suspended to 0.5  $\mu$ M and illuminated with 0.5 sec flashes of white light (*red arrows*) at 10°C. Panels B, D, and F show the data following the initial light flash from Panels A, C and E and a fit to a single exponential and the the half time values for the fit are shown (+/- 4 s).

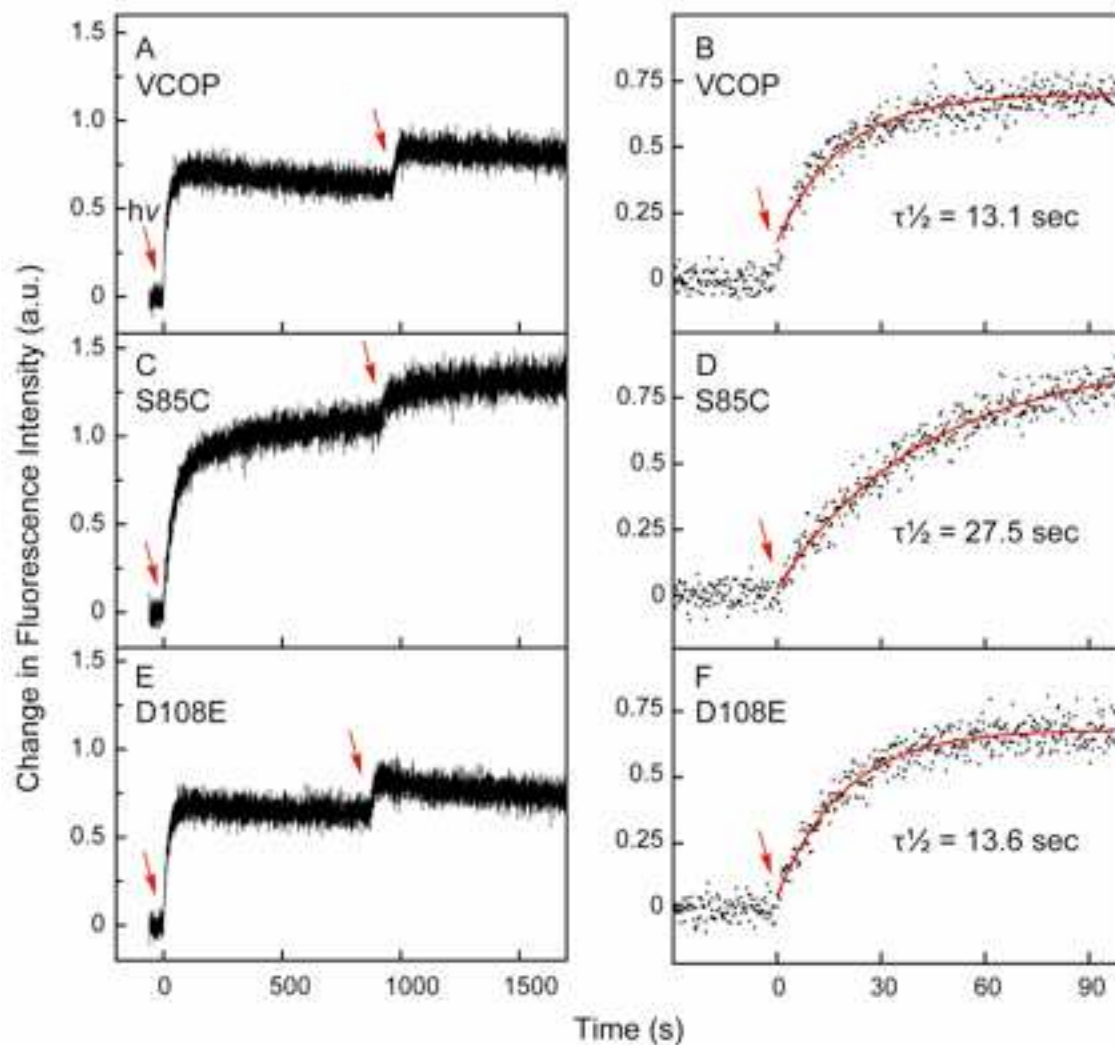

Supplement: NIHMS375940-supplement-1_si_001.pdf [file NIHMS375940-supplement-1_si_001.pdf]
